# Supplementary material for: A facile aptasensor based on polydopamine nanospheres for high-sensitivity sensing of T-2 toxin
Source: Royal Society of Chemistry journal article supplement (doi:10.1039/d1ay00642h), 2021-01-01
Supplement: d1ay00642h1.pdf [file d1ay00642h1.pdf]

## Supporting Information

### A facile aptasensor based on polydopamine nanospheres for the high-sensitivity sensing of T-2 toxin

Ting Guo<sup>a#</sup>, Changchang Wang<sup>d#</sup>, Hongyuan Zhou<sup>a</sup>, Yuhao Zhang<sup>a,c</sup>, Liang Ma<sup>a,b,c\*</sup>  
and Shuo Wang<sup>e</sup>

- a Ministry of Education, College of Food Science, Southwest University, Chongqing, 400715, P.R. China
- b Key Laboratory of Luminescence Analysis and Molecular Sensing (SouthwestUniversity), Ministry of Education, Chongqing 400715, P. R. China
- c Biological Science Research Center, Southwest University, Chongqing, 400715, P.R.China
- d Institute of Environment and Safety, Wuhan Academy of Agricultural Science, Wuhan 430207, P. R. China.
- e Medical College, Nankai University, Tianjin, 300457, P. R. China

\*Corresponding author: Liang Ma

Email: [zhyhml@163.com](mailto:zhyhml@163.com)

# Ting Guo and Changchang Wang contributed equally to this work.

**Table S1.** Comparison of our methods with developed methods for T-2.

| Methods                                            | LOD<br>( $\mu\text{g L}^{-1}$ ) | Linear range<br>( $\mu\text{g L}^{-1}$ ) | Ref.      |
|----------------------------------------------------|---------------------------------|------------------------------------------|-----------|
| LC with fluorescence                               | 5                               | 10-150                                   | [1]       |
| GO-based aptasensor                                | 186.63                          | 233.29-17496.75                          | [2]       |
| PDANSs-based aptasensor                            | 7.23                            | 10-180                                   | This work |
| Imaging surface plasmon resonance (iSPR) biosensor | 12                              | 42-1836                                  | [3]       |
| Electrochemical sensor                             | 0.14                            | 0.51-979.82                              | [4]       |

**Table S2.** Recoveries of T-2 toxin in spiked samples by the aptamer-based fluorescent assay.

| Sample | Spiked T-2 ( $\mu\text{g L}^{-1}$ ) | % Recovery | % RSD |
|--------|-------------------------------------|------------|-------|
| Rice   | 40                                  | 81.57      | 3.15  |
|        | 100                                 | 85.05      | 3.77  |
|        | 160                                 | 88.72      | 2.23  |
| Wine   | 40                                  | 86.29      | 3.76  |
|        | 100                                 | 88.85      | 4.32  |
|        | 160                                 | 92.24      | 3.08  |
| Malt   | 40                                  | 96.98      | 6.43  |
|        | 100                                 | 86.27      | 3.66  |
|        | 160                                 | 101.07     | 3.01  |

**Table S3.** Comparison between aptasensor and LC-MS.

| Sample                              | Rice                           |    |       | Wine  |       |       |
|-------------------------------------|--------------------------------|----|-------|-------|-------|-------|
|                                     | LC-MS ( $\mu\text{g L}^{-1}$ ) | ND | ND    | 16.25 | 9.27  | 33.22 |
| Aptasensor ( $\mu\text{g L}^{-1}$ ) | ND                             | ND | 23.71 | 11.66 | 31.14 | 53.93 |

Note: samples rice and wine were suspected positive samples from a company.

## Reference

- [1] M. Pascale, M. Haidukowski, A. Visconti, *Journal of Chromatography A*, 2003, **989**, 257-264.
- [2] X. Chen, Y. Huang, N. Duan, S. Wu, X. Ma, Y. Xia, C. Zhu, Y. Jiang, Z. Wang, *Journal of Agricultural and Food Chemistry*, 2014, **62**, 10368-10374.
- [3] M.Z. Hossain, C.M. Maragos, *Biosensors and Bioelectronics*, 2018, **101**, 245-252.
- [4] X. Gao, W. Cao, M. Chen, H. Xiong, X. Zhang, S. Wang, *Electroanalysis*, 2014, **26**, 2739-2746.
